# Supplementary material for: Time-resolved targeted metabolomics shows an abrupt switch from Calvin- Benson-Bassham cycle to tricarboxylic acid cycle when the light is turned off
Source: Research Square preprint supplement (doi:10.21203/rs.3.rs-6839843/v1), 2025-07-03
Supplement: Supplementary file 1 [file a529008ac50cfb05fe930339.xlsx]

## Sheet: Cover Sheet
Supplemental materials
	Metabolic Profile of the Switch from Photosynthesis to Respiration When the Light Is Turned Off
	Yuan Xu1, Stephanie C. Schmiege1,2,3,4, Thomas D. Sharkey1,2,5
	1MSU-DOE Plant Research Laboratory, Michigan State University, East Lansing MI 48824, USA 2Plant Resilience Institute, Michigan State University, East Lansing MI 48824, USA 3Department of Biology, Western University, London, Ontario, Canada N6A 5B7, and 4Department of Biological Sciences, Union College, Schenectady NY, 5Department of Biochemistry and Molecular Biology, Michigan State University, …
	Table S1. LC-MS/MS and GC-MS Parameters for Metabolite Detection.
	Table S2. Quantification of metabolites and ¹³C labeling dynamics in key metabolic pathways.

## Sheet: Table S1
Table S1. LC-MS/MS and GC-MS Parameters for Metabolite Detection. Parameters for metabolite analysis were optimized for LC-MS/MS and GC-MS. Multiple reaction monitoring (MRM) was used for reverse-phase and anion-exchange LC-MS/MS, with a dwell time of 20 ms per transition. Q1 (m/z) represents the precursor ion, while Q3 (m/z) represents the product ion. Cone voltage and collision energy were opti…
Multiple reaction monitoring (MRM) with LC-MS/MS
Metabolites	C atoms	Isotopomers	Q1[Q3] (m/z) of mass isotopomers	Cone (V)	Collision (V)
2PG	2	[M]+ - [M+2]+	155[79], 156[79], 157[79]	26	13
PEP	3	[M]+ - [M+3]+	167[79], 168[79], 169[79], 170[79]	18	22
PGA	3	[M]+ - [M+3]+	185[97], 186[97], 187[97], 188[97]	16	17
GAP/DHAP	3	[M]+ - [M+3]+	169[97], 170[97], 171[97], 172[97]	18	10
R5P	5	[M]+ - [M+5]+	229[97], 230[97], 231[97], 232[97], 233[97], 234[97]	16	17
RU5P/XU5P	5	[M]+ - [M+5]+	229[97], 230[97], 231[97], 232[97], 233[97], 234[97]	16	17
RUBP	5	[M]+ - [M+5]+	309[97], 310[97], 311[97], 312[97], 313[97], 314[97]	28	21
6PG	6	[M]+ - [M+6]+	275[97], 276[97], 277[97], 278[97], 279[97], 280[97], 281[97]	20	23
G6P/F6P	6	[M]+ - [M+6]+	259[97], 260[97], 261[97], 262[97], 263[97], 264[97], 265[97]	26	18
S7P	7	[M]+ - [M+7]+	289[97], 290[97], 291[97], 292[97], 293[97], 294[97], 295[97], 296[97]	20	20
ADPG	6	[M]+ - [M+6]+	588[346], 589[346], 590[346], 591[346], 592[346], 593[346], 594[346]	16	25
UDPG	6	[M]+ - [M+6]+	565[323], 566[323], 567[323], 568[323], 569[323], 570[323], 571[323]	16	25
Selected ion monitoring (SIM) with GC-MS
Metabolite	Mass range	Carbon atoms
Glycine	218-220	2
Asparagine	302-304	1, 2
Serine	288-291	2, 3
Alanine	232-235	2, 3
Glycerate	391-394	1, 2, 3
Pyruvate	174-177	1, 2, 3
Aspartate	316-320	2, 3, 4
Threonine	376-379	2, 3, 4
Succinate	289-294	1, 2, 3, 4
Fumarate	287-292	1, 2, 3, 4
Malate	419-424	1, 2, 3, 4
Glutamate	330-334	2, 3, 4, 5
Glutamine	431-436	1, 2, 3, 4, 5
Citrate	591-598	1, 2, 3, 4, 5, 6

## Sheet: Table S2
Table S2. Quantification of metabolites and ¹³C labeling dynamics in key metabolic pathways. This table presents the degree of ¹³C labeling (columns B–G), metabolite pool sizes (columns H–M), and total ¹³C atoms (columns N–S). Three replicates were measured, and the average and standard deviation (SD) were calculated. Degree of label (%): Proportion of labeled carbon atoms incorporated into each …
Pathway	13C degree of label (%)						Metabolite pool sizes (nmol metabolites g-1 FW)						Total 13C atoms (nmol 13C g-1 FW)						Total 13C atoms in all metabolites (nmol 13C g-1 FW)
CBB	RUBP	REP_1	REP_2	REP_3	Average	SD	RUBP	REP_1	REP_2	REP_3	Average	SD	RUBP	REP_1	REP_2	REP_3	Average	SD	All metabolites
	0	95.8087	95.3862	95.3927	95.5292	0.242096	0	75.7039	88.5615	105.77	90.0118	15.0853	0	362.655	422.377	504.483	429.838	71.2078	0	11226.5
	10	91.9961	91.1259	91.1406	91.4209	0.498237	10	9.69507	12.6483	15.5086	12.6173	2.90687	10	44.5955	57.6295	70.673	57.6327	13.0388	10	18137.3
	30	87.365	89.9443	89.0039	88.7711	1.30535	30	8.14132	9.86392	11.4935	9.83292	1.67631	30	35.5633	44.3602	51.1484	43.6906	7.81409	30	19701.9
	60	84.3244	86.4505	85.202	85.3256	1.06843	60	7.31421	8.63695	9.8667	8.60595	1.27653	60	30.8383	37.3334	42.0331	36.735	5.62137	60	24412.9
	180	79.6865	80.7151	79.2599	79.8872	0.748084	180	9.49092	10.6187	11.6534	10.5877	1.08157	180	37.8149	42.8543	46.1823	42.2838	4.21277	180	22944
	600	77.6101	77.4456	77.4832	77.513	0.086214	600	5.94075	4.83881	3.64386	4.80781	1.14876	600	23.0531	18.7372	14.1169	18.6357	4.46896	600	26282
	PGA						PGA						PGA
	0	93.7717	93.5881	93.634	93.6646	0.0955482	0	186.897	144.38	125.766	152.347	31.3347	0	525.768	405.366	353.278	428.138	88.4709
	10	93.2963	92.8832	93.2887	93.1561	0.236345	10	656.574	747.617	838.568	747.586	90.9971	10	1837.68	2083.23	2346.87	2089.26	254.649
	30	93.5531	93.7494	93.313	93.5385	0.218563	30	565.938	671.872	777.714	671.841	105.888	30	1588.36	1889.63	2177.13	1885.04	294.411
	60	92.7478	92.6794	92.2168	92.548	0.288868	60	315.051	293.687	272.231	293.656	21.41	60	876.608	816.563	753.128	815.433	61.7482
	180	92.8634	92.1913	91.5487	92.2012	0.657389	180	170.596	196.434	222.179	196.403	25.7917	180	475.263	543.286	610.207	542.919	67.4726
	600	84.4206	81.6466	82.9961	83.0211	1.38716	600	155.228	130.076	104.832	130.045	25.1981	600	393.133	318.609	261.019	324.254	66.2377
	GAP/DHAP						GAP/DHAP						GAP/DHAP
	0	91.0309	91.2736	91.2129	91.1725	0.126323	0	146.643	208.229	207.289	187.387	35.2882	0	400.472	570.174	567.223	512.623	97.1368
	10	85.8037	87.2022	87.0606	86.6888	0.76979	10	19.6602	22.2497	24.7461	22.2187	2.54309	10	50.6076	58.2066	64.6324	57.8155	7.02055
	30	87.2047	86.2161	84.9079	86.1096	1.1521	30	38.8409	31.8328	24.7318	31.8018	7.05459	30	101.613	82.335	62.9977	82.3153	19.3078
	60	81.9279	80.5223	77.6319	80.0274	2.19031	60	62.5886	47.7667	32.8518	47.7357	14.8684	60	153.832	115.388	76.5104	115.244	38.6612
	180	74.2875	74.899	76.2453	75.1439	1.00158	180	66.1683	77.3396	88.4178	77.3086	11.1248	180	147.464	173.78	202.243	174.496	27.3963
	600	71.2018	69.3996	70.7253	70.4422	0.933832	600	24.5645	19.9724	15.2874	19.9414	4.63867	600	52.4712	41.5824	32.4361	42.1632	10.0302
	ADPG						ADPG						ADPG
	0	95.8469	95.6041	95.6648	95.7053	0.126377	0	6.29984	7.64932	7.19861	7.04926	0.687025	0	36.2292	43.8784	41.3192	40.4756	3.89373
	10	93.4787	85.7091	88.4432	89.2103	3.94116	10	0.644937	0.780981	0.824026	0.749981	0.0934821	10	3.61727	4.01623	4.37277	4.00209	0.377945
	30	92.6964	92.5843	92.4128	92.5645	0.142803	30	0.918565	1.25953	1.5075	1.22853	0.295691	30	5.10886	6.99679	8.35877	6.82147	1.63203
	60	76.0791	80.8719	82.709	79.8867	3.42296	60	1.06056	1.16076	1.16795	1.12976	0.0600332	60	4.8412	5.63237	5.79602	5.4232	0.51062
	180	67.9273	75.0967	74.385	72.4697	3.94985	180	0.973256	1.25246	1.43866	1.22146	0.234247	180	3.96664	5.64334	6.4209	5.34363	1.25428
	600	59.1203	64.1412	63.183	62.1482	2.66563	600	1.49732	1.97854	2.36677	1.94754	0.435554	600	5.31131	7.61437	8.97237	7.29935	1.85075
	P5P						P5P						P5P
	0	96.2541	96.0444	96.059	96.1192	0.117096	0	40.335	31.9753	28.7669	33.6924	5.9722	0	194.121	153.552	138.166	161.946	28.9065
	10	94.2396	94.5305	94.2201	94.3301	0.173837	10	12.1875	10.1148	7.94899	10.0838	2.11944	10	57.4274	47.8077	37.4477	47.5609	9.99213
	30	86.4683	89.8269	89.2878	88.5277	1.80372	30	8.97417	8.47757	7.88797	8.44657	0.543765	30	38.7991	38.0757	35.215	37.3632	1.89529
	60	80.5445	84.7651	84.2061	83.1719	2.2925	60	11.6316	9.01111	6.29766	8.98011	2.66708	60	46.8429	38.1914	26.5151	37.1831	10.2013
	180	75.6856	75.3464	75.0539	75.362	0.316136	180	6.09612	5.28785	4.38657	5.25685	0.855199	180	23.0694	19.921	16.4615	19.8173	3.30521
	600	80.9698	77.4684	77.6761	78.7048	1.96434	600	2.52762	2.26295	1.90529	2.23195	0.312321	600	10.233	8.76537	7.39977	8.79939	1.41694
	S7P						S7P						S7P
	0	95.4732	95.5524	95.5326	95.5194	0.0412493	0	35.428	37.3246	53.4455	42.0661	9.90042	0	236.77	249.652	357.405	281.276	66.244
	10	94.9872	94.9209	94.8817	94.9299	0.0533149	10	32.54	35.459	38.2851	35.428	2.87269	10	216.362	235.606	254.279	235.416	18.9594
	30	95.1159	94.4397	94.0125	94.5227	0.55634	30	22.3833	27.9121	33.3478	27.8811	5.48227	30	149.031	184.52	219.457	184.336	35.2137
	60	93.9523	93.4255	93.8238	93.7339	0.274672	60	50.6543	79.6025	108.458	79.5715	28.9017	60	333.136	520.583	712.314	522.011	189.593
	180	94.1097	93.6215	90.092	92.6077	2.19233	180	41.1475	45.7156	50.1906	45.6846	4.52165	180	271.067	299.597	316.524	295.729	22.9744
	600	87.7094	87.8357	88.2248	87.9233	0.26865	600	13.3872	11.7212	9.96231	11.6902	1.71264	600	82.1927	72.068	61.5246	71.9284	10.3347
Cytosolic	PEP						PEP						PEP
	0	95.2761	95.9206	96.3359	95.8442	0.534004	0	14.6741	19.0821	17.0539	16.9367	2.20638	0	41.9426	54.9111	49.2872	48.7137	6.50323
	10	96.8336	95.9629	95.8933	96.2299	0.523969	10	53.081	73.4013	93.6286	73.3703	20.2738	10	154.201	211.314	269.351	211.622	57.5755
	30	96.3735	96.672	96.6316	96.559	0.161951	30	66.4987	76.3166	86.0416	76.2856	9.7715	30	192.261	221.33	249.43	221.007	28.5858
	60	96.3365	94.6194	94.0503	95.0021	1.19016	60	80.3877	98.8285	117.176	98.7975	18.3944	60	232.328	280.533	330.614	281.158	49.1461
	180	95.1426	94.9168	94.1207	94.7267	0.536804	180	55.3068	77.2017	99.0037	77.1707	21.8484	180	157.861	219.832	279.549	219.081	60.8474
	600	87.3328	87.2269	88.0963	87.552	0.474371	600	88.2375	97.7985	107.266	97.7675	9.51453	600	231.181	255.92	283.493	256.865	26.1691
	Pyruvate						Pyruvate						Pyruvate
	0	34.8029	30.1848	25.23	30.0725	4.78743	0	92.2858	80.6898	122.875	98.617	21.7937	0	96.3543	73.0681	93.0042	87.4755	12.5891
	10	38.1315	33.7854	34.6922	35.5364	2.29274	10	219.231	276.888	334.453	276.857	57.6111	10	250.788	280.643	348.087	293.173	49.8451
	30	41.1606	41.662	32.1215	38.3147	5.3693	30	340.991	363.277	385.47	363.246	22.2396	30	421.062	454.045	371.457	415.521	41.5722
	60	55.7039	53.1319	46.8857	51.9072	4.53487	60	351.891	434.772	517.559	434.741	82.8338	60	588.052	693.008	727.984	669.681	72.824
	180	69.21	55.0374	59.6493	61.2989	7.22885	180	568.381	492.798	417.123	492.767	75.6291	180	1180.13	813.67	746.433	913.41	233.419
	600	48.0072	44.2013	35.0525	42.4203	6.65845	600	385.165	315.266	245.273	315.235	69.9463	600	554.721	418.054	257.923	410.233	148.554
	G6P/F6P						G6P/F6P						G6P/F6P
	0	88.7509	87.3873	87.7282	87.9555	0.709618	0	57.2174	64.5597	79.2876	67.0216	11.2392	0	304.686	338.502	417.346	353.511	57.8103
	10	87.4874	81.6071	83.6996	84.2647	2.98062	10	60.3416	63.6059	66.7772	63.5749	3.21794	10	316.748	311.441	335.354	321.181	12.5574
	30	80.8405	79.3485	81.0929	80.4273	0.942752	30	61.6076	54.1089	46.5172	54.0779	7.54525	30	298.823	257.608	226.333	260.921	36.3586
	60	73.9948	73.6234	72.5635	73.3939	0.742751	60	56.7336	63.7291	70.6316	63.6981	6.94905	60	251.88	281.517	307.517	280.304	27.8383
	180	67.2102	66.7886	66.2161	66.7383	0.498943	180	49.3428	59.4329	69.4299	59.4019	10.0436	180	198.98	238.166	275.843	237.663	38.4337
	600	48.6609	48.1021	50.0926	48.9518	1.02668	600	31.7627	35.9992	40.1428	35.9682	4.19016	600	92.7359	103.898	120.652	105.762	14.0508
	UDPG						UDPG						UDPG
	0	82.4252	81.3894	81.6484	81.821	0.539019	0	200.893	170.389	146.489	172.591	27.2686	0	993.519	832.072	717.638	847.743	138.607
	10	78.452	77.1343	79.3728	78.3197	1.12511	10	261.192	241.103	220.921	241.072	20.1358	10	1229.46	1115.84	1052.1	1132.47	89.841
	30	67.7686	63.4107	66.7729	65.9841	2.28353	30	247.548	229.629	211.618	229.598	17.9647	30	1006.56	873.658	847.822	909.346	85.1735
	60	60.4294	61.5537	61.7365	61.2399	0.707812	60	346.15	295.907	245.57	295.876	50.2901	60	1255.06	1092.85	909.638	1085.85	172.817
	180	61.6269	60.6917	58.8465	60.3884	1.41482	180	271.773	220.405	168.944	220.374	51.4143	180	1004.91	802.605	596.505	801.34	204.205
	600	47.2181	46.5353	46.0264	46.5933	0.597967	600	203.923	225.372	246.727	225.341	21.4019	600	577.732	629.265	681.357	629.451	51.8128
Photorespiration	2PG						2PG						2PG
	0	97.3804	96.6914	94.7426	96.2715	1.36811	0	22.6339	23.7918	34.9546	27.1268	6.80377	0	44.0819	46.0092	66.2338	52.1083	12.2709
	10	95.1366	91.0473	89.533	91.9056	2.89873	10	5.11524	5.83456	6.46088	5.80356	0.673354	10	9.73293	10.6244	11.5692	10.6422	0.918279
	30	89.6824	92.5448	86.7467	89.658	2.8991	30	9.41236	10.7661	12.0267	10.7351	1.30747	30	16.8825	19.9268	20.8656	19.225	2.08227
	60	79.0768	86.6175	85.6419	83.7787	4.10112	60	15.1495	18.0275	20.8126	17.9965	2.8317	60	23.9594	31.23	35.6486	30.2794	5.90231
	180	97.3861	96.9883	96.6243	96.9995	0.381018	180	16.2408	17.5705	18.8072	17.5395	1.28345	180	31.6326	34.0826	36.3446	34.0199	2.35662
	600	97.5342	97.0303	97.1188	97.2278	0.269031	600	4.3764	3.53585	2.6023	3.50485	0.887456	600	8.53697	6.86169	5.05464	6.81777	1.74158
	Glycine						Glycine						Glycine
	0	54.3635	52.2424	51.4996	52.7019	1.48619	0	69.1542	64.8915	46.7367	60.2608	11.9046	0	75.1893	67.8018	48.1385	63.7099	13.982
	10	38.0124	47.5215	58.3557	47.9632	10.1788	10	81.9899	76.869	71.6552	76.838	5.16742	10	62.3327	73.0586	83.6297	73.007	10.6486
	30	29.3207	42.9243	42.3884	38.2111	7.70398	30	97.2584	84.5917	71.832	84.5607	12.7132	30	57.0337	72.6207	60.8969	63.5171	8.11712
	60	30.1942	28.5676	35.6263	31.4627	3.69639	60	94.1745	106.182	118.096	106.151	11.9607	60	56.8704	60.6671	84.1464	67.228	14.7742
	180	11.5092	42.0117	14.5071	22.676	16.8122	180	65.0376	42.1016	53.6161	53.5851	11.468	180	14.9706	35.3752	15.5563	21.9674	11.6152
	600	10.5523	42.3426	33.6262	28.8404	16.4266	600	44.8864	29.6683	37.3238	37.2928	7.60907	600	9.47313	25.1247	25.1011	19.8997	9.02964
	Serine						Serine						Serine
	0	58.6494	60.5471	61.5766	60.2577	1.48492	0	345.835	349.114	227.011	307.32	69.5687	0	608.491	634.134	419.358	553.994	117.301
	10	84.8507	65.3672	70.0805	73.4328	10.1651	10	874.694	691.701	508.616	691.67	183.039	10	2226.55	1356.44	1069.32	1550.77	602.593
	30	77.8552	75.7987	74.8118	76.1552	1.55268	30	1463.26	1781.16	2098.97	1781.13	317.853	30	3417.67	4050.29	4710.83	4059.6	646.628
	60	66.0411	66.4475	76.7337	69.7408	6.05948	60	1378.45	1497.85	1617.17	1497.82	119.358	60	2731.03	2985.86	3722.73	3146.54	515.009
	180	67.9969	82.2336	53.9379	68.0561	14.1479	180	1170.64	1056.64	1284.55	1170.61	113.953	180	2388	2606.74	2078.57	2357.77	265.378
	600	72.2083	67.3163	76.926	72.1502	4.80512	600	612.087	773.577	934.974	773.546	161.444	600	1325.93	1562.23	2157.72	1681.96	428.622
	Glycerate						Glycerate						Glycerate
	0	18.7613	14.9215	26.5954	20.0927	5.94977	0	5441.54	4483.49	2605.13	4176.72	1442.87	0	3062.71	2007.01	2078.53	2382.75	589.947
	10	12.5	18.3741	8.31351	13.0625	5.05383	10	8750.92	10883.1	13015.2	10883.1	2132.14	10	3281.6	5999.02	3246.06	4175.56	1579.26
	30	12.0698	15.0835	37.7652	21.6395	14.0463	30	3590.6	4764.18	5937.67	4764.15	1173.54	30	1300.14	2155.82	6727.13	3394.36	2917.8
	60	11.7105	23.601	13.5511	16.2876	6.40016	60	10674.9	13062.9	15450.8	13062.8	2387.93	60	3750.26	9248.92	6281.25	6426.81	2752.22
	180	21.0742	11.1378	24.2765	18.8295	6.85094	180	6981.73	7501.2	5974.8	6819.24	776.062	180	4414.03	2506.4	4351.42	3757.28	1083.75
	600	5.43627	9.96395	15.9351	10.4451	5.26594	600	6892.88	8387.88	9882.79	8387.85	1494.95	600	1124.15	2507.29	4724.51	2785.32	1816.21	Relative number of 13C atoms
TCA cycle	Citrate						Citrate						Citrate
	0	0.0940932	0.528948	0.024478	0.21584	0.273385	0	11440.1	7735.13	12269.9	10481.7	2414.51	0	64.5863	245.489	18.0205	109.365	120.164	0.0133847
	10	0.300423	1.71501	1.62409	1.21317	0.79177	10	20200.5	22880.3	25560	22880.3	2679.77	10	364.121	2354.39	2490.7	1736.4	1190.39	0.21251
	30	1.31285	1.43364	3.0477	1.9314	0.968628	30	16128.9	19149.6	22170.3	19149.6	3020.7	30	1270.49	1647.22	4054.09	2323.93	1510.16	0.284415
	60	1.928	2.28543	1.06128	1.75824	0.629485	60	16290.5	21657.4	27024.1	21657.3	5366.79	60	1884.49	2969.78	1720.8	2191.69	678.795	0.268231
	180	6.59075	1.97079	3.58207	4.04787	2.34494	180	12328.3	19776.3	16052.3	16052.3	3724	180	4875.15	2338.49	3450.03	3554.55	1271.56	0.435025
	600	9.23614	5.25785	5.95624	6.81675	2.12416	600	17880.7	23087.2	20484	20484	2603.24	600	9908.94	7283.35	7320.47	8170.92	1505.28	1
	Succinate						Succinate						Succinate
	0	0.032023	0.870889	0.90145	0.601454	0.493378	0	109.552	133.498	116.132	119.727	12.3709	0	0.140328	4.65046	4.1875	2.99276	2.4811	0.100124
	10	0.169602	0.280893	1.2199	0.556797	0.57695	10	241.069	219.135	197.108	219.104	21.9806	10	1.63544	2.46214	9.61805	4.57188	4.38962	0.152953
	30	1.00031	0.64382	0.525362	0.723164	0.247217	30	126.412	116.969	107.433	116.938	9.48949	30	5.05805	3.01227	2.25764	3.44266	1.44896	0.115175
	60	1.62406	4.454	0.113282	2.06378	2.20351	60	439.646	308.802	570.398	439.615	130.798	60	28.5605	55.0161	2.58463	28.7204	26.2161	0.960848
	180	3.50171	1.38263	1.18252	2.02229	1.28512	180	104.14	134.716	165.198	134.685	30.5293	180	14.5867	7.45044	7.81401	9.95038	4.01928	0.332893
	600	5.66931	2.93224	3.59797	4.06651	1.42742	600	156.284	189.414	222.45	189.383	33.0827	600	35.441	22.2163	32.0147	29.8907	6.86346	1
	Fumarate						Fumarate						Fumarate
	0	0.641351	3.84965	2.88579	2.45893	1.64619	0	319.198	263.597	292.093	291.629	27.8036	0	8.18872	40.5902	33.7168	27.4986	17.0723	0.493821
	10	0.867206	1.77524	3.37494	2.00579	1.26967	10	466.39	414.988	363.494	414.957	51.4478	10	16.1782	29.4681	49.0708	31.5724	16.547	0.566978
	30	1.49492	1.85434	3.26674	2.20533	0.93661	30	370.441	370.441	283.967	341.617	49.9259	30	22.1511	27.477	37.1059	28.9113	7.57985	0.519191
	60	1.16846	2.37276	2.06409	1.86844	0.625532	60	1031.47	559.961	795.761	795.73	235.753	60	48.2092	53.146	65.7008	55.6853	9.01803	1
	180	2.00611	1.72667	1.89402	1.8756	0.140629	180	507.205	397.789	288.279	397.758	109.463	180	40.7004	27.474	21.8403	30.0049	9.68142	0.538829
	600	3.12001	2.32864	1.95684	2.4685	0.59406	600	423.437	484.075	544.62	484.044	60.5915	600	52.845	45.0893	42.6294	46.8546	5.33166	0.841417
	Malate						Malate						Malate
	0	0.754148	7.14235	6.12523	4.67391	3.43249	0	18801.8	11942.2	18079.8	16274.6	3769.27	0	567.174	3411.83	4429.7	2802.9	2001.97	0.67833
	10	4.39589	3.11513	7.72353	5.07818	2.37876	10	18801.9	21103.7	16499.9	18801.8	2301.88	10	3306.04	2629.63	5097.51	3677.72	1275.23	0.890045
	30	7.68283	2.42734	6.04494	5.38504	2.68917	30	10799.2	20894.8	15847	15847	5047.78	30	3318.74	2028.75	3831.77	3059.75	928.994	0.74049
	60	7.55777	4.81902	5.07268	5.81649	1.51332	60	15278.4	21165.8	18222.2	18222.1	2943.7	60	4618.84	4079.94	3697.41	4132.06	462.919	1
	180	9.47575	1.66415	5.10331	5.4144	3.91508	180	12921.8	19757.6	16339.8	16339.7	3417.92	180	4897.75	1315.19	3335.48	3182.81	1796.16	0.77027
	600	6.06906	4.76608	4.8623	5.23248	0.726094	600	14317	20726.3	17521.7	17521.6	3204.64	600	3475.62	3951.32	3407.83	3611.59	296.161	0.87404
Keto glutarate amino acids	Glutamate						Glutamate						Glutamate
	0	0.370408	4.64836	3.41696	2.81191	2.20222	0	2324.8	1525.51	2031.49	1960.6	404.33	0	43.0562	354.557	347.075	248.23	177.725	0.0483309
	10	2.23627	5.17171	1.94643	3.11814	1.78434	10	4145.54	3487.23	2828.82	3487.2	658.362	10	463.528	901.747	275.305	546.86	321.427	0.106475
	30	5.26067	4.52012	1.6154	3.79873	1.92673	30	2851.62	3630.9	4410.09	3630.87	779.232	30	750.073	820.606	356.203	642.294	250.259	0.125056
	60	7.93218	5.49761	3.28145	5.57041	2.32622	60	4152.41	5972.27	7792.04	5972.24	1819.82	60	1646.88	1641.66	1278.46	1522.33	211.218	0.296402
	180	10.5965	4.25584	3.95758	6.26997	3.74985	180	4897.47	5540.09	6182.61	5540.06	642.571	180	2594.8	1178.89	1223.41	1665.7	804.935	0.324316
	600	13.2788	11.518	8.82277	11.2065	2.24429	600	7472.77	9424.93	11377	9424.9	1952.12	600	4961.47	5427.83	5018.83	5136.04	254.316	1
	Glutamine						Glutamine						Glutamine
	0	1.61399	4.61677	2.51194	2.91423	1.54128	0	1242.54	804.55	955.041	1000.71	222.54	0	100.273	185.721	119.95	135.315	44.7482	0.290667
	10	1.76389	3.99668	1.90003	2.55353	1.25165	10	1930.82	1382.6	1656.76	1656.73	274.111	10	170.287	276.29	157.395	201.324	65.2419	0.43246
	30	4.34927	3.90532	1.08473	3.11311	1.7706	30	1464.23	1959.26	2454.2	1959.23	494.983	30	318.417	382.577	133.107	278.034	129.545	0.597239
	60	7.11289	3.50296	1.86376	4.15987	2.68551	60	1466.5	1892.24	2317.88	1892.21	425.691	60	521.552	331.422	215.998	356.324	154.292	0.765413
	180	5.11664	3.64253	1.0649	3.27469	2.05076	180	1459.97	1760.62	2061.17	1760.59	300.601	180	373.508	320.656	109.748	267.97	139.55	0.575622
	600	5.89545	6.07489	3.20795	5.05943	1.60594	600	1891.44	1620.54	2162.24	1891.41	270.85	600	557.545	492.232	346.819	465.532	107.87	1
OAA derived amino acids	Aspartate						Aspartate						Aspartate
	0	38.4761	38.797	38.3938	38.5556	0.213037	0	881.026	847.351	561.118	763.165	175.786	0	1355.94	1314.99	861.738	1177.55	274.27	0.598617
	10	32.459	32.8421	35.1993	33.5001	1.48394	10	1023.19	881.057	738.83	881.026	142.18	10	1328.47	1157.43	1040.25	1175.38	144.945	0.597513
	30	32.1511	33.3497	41.2021	35.5677	4.91626	30	618.307	778.128	937.857	778.097	159.775	30	795.17	1038.01	1545.67	1126.28	382.956	0.572554
	60	29.9128	34.8347	39.3561	34.7012	4.72306	60	1428.33	1683.99	1172.57	1428.29	255.709	60	1709.01	2346.45	1845.91	1967.12	335.561	1
	180	33.397	28.2115	31.5456	31.0514	2.62784	180	835.448	910.292	985.043	910.261	74.7978	180	1116.06	1027.23	1242.95	1128.75	108.419	0.573805
	600	20.2706	29.9824	25.3544	25.2025	4.85768	600	890.137	1141.63	1393.03	1141.6	251.445	600	721.745	1369.15	1412.77	1167.89	386.988	0.593704
	Asparagine						Asparagine						Asparagine
	0	8.05347	11.0426	8.23816	9.11142	1.67503	0	82.9214	59.0958	64.1156	68.7109	12.56	0	26.7122	26.1029	21.1278	24.6476	3.06348	0.205495
	180	11.2876	12.6282	8.6257	10.8472	2.03729	180	55.6401	41.4917	27.2503	41.4607	14.1949	180	25.1218	20.9587	9.40213	18.4942	8.14447	0.154192
	420	14.0302	10.6282	14.8234	13.1606	2.22868	420	55.5785	65.7645	75.8575	65.7335	10.1395	420	31.191	27.9584	44.9786	34.7093	9.03914	0.289383
	600	24.7148	13.0339	11.2369	16.3285	7.31807	600	80.8844	100.072	119.167	100.041	19.1415	600	79.9616	52.1732	53.5628	61.8992	15.6579	0.516074
	900	21.4281	15.1449	10.7411	15.7713	5.37096	900	93.3773	76.3113	59.1523	76.2803	17.1125	900	80.0357	46.2291	25.4144	50.5597	27.567	0.421533
	3600	26.5238	21.0238	16.1846	21.2441	5.17309	3600	116.818	145.888	174.865	145.857	29.0238	3600	123.938	122.685	113.205	119.943	5.86828	1
	Threonine						Threonine						Threonine
	0	0.283384	4.08926	4.07691	2.81652	2.19377	0	232.386	208.241	161.452	200.693	36.0645	0	2.63418	34.0621	26.329	21.0084	16.3756	0.380493
	10	3.9171	2.37144	3.33921	3.20925	0.780985	10	185.691	236.798	211.291	211.26	25.5535	10	29.0949	22.4621	28.2218	26.5929	3.60395	0.481636
	30	7.18092	1.34088	4.19987	4.24056	2.92023	30	167.16	272.454	219.853	219.822	52.647	30	48.0145	14.6131	36.9342	33.1873	17.013	0.60107
	60	2.77604	4.51499	7.18972	4.82691	2.22331	60	257.658	233.512	209.272	233.481	24.1933	60	28.6108	42.1721	60.1842	43.6557	15.8389	0.790668
	180	2.77737	1.88359	2.64912	2.43669	0.483272	180	261.451	448.268	354.906	354.875	93.4086	180	29.0457	33.7741	37.6074	33.4758	4.28863	0.606294
	600	6.76472	2.48351	8.44528	5.89783	3.07397	600	247.577	287.612	207.448	247.546	40.0823	600	66.9914	28.5715	70.0782	55.2137	23.1244	1
	Alanine						Alanine						Alanine
	0	59.4059	64.9158	56.4775	60.2664	4.28446	0	313.174	234.072	167.688	238.311	72.8358	0	558.132	455.85	284.118	432.7	138.466	0.120292
	10	73.9138	53.0556	62.3503	63.1066	10.4497	10	288.425	239.095	189.673	239.064	49.3762	10	639.558	380.56	354.784	458.301	157.501	0.12741
	30	69.5806	60.4103	58.0103	62.6671	6.10638	30	403.657	307.005	210.26	306.974	96.6985	30	842.601	556.388	365.917	588.302	239.939	0.16355
	60	60.4557	53.2872	56.2861	56.6763	3.60015	60	273.449	314.84	356.138	314.809	41.3444	60	495.947	503.308	601.368	533.541	58.855	0.148327
	180	76.1621	80.7118	50.8025	69.2254	16.1161	180	1778.03	1458.95	2097.02	1778	319.038	180	4062.56	3532.63	3196.02	3597.07	436.849	1
	600	73.9291	70.3289	59.9692	68.0758	7.24756	600	453.922	549.45	644.885	549.419	95.4817	600	1006.74	1159.27	1160.2	1108.74	88.3304	0.308233

## Sheet: Misc graphs
Miscellaneous Graphs. This supplement includes draft sketches of all figures presented in the main text. These are provided to help reviewers understand how each figure was constructed and to ensure clarity regarding the data visualization, in response to reviewer concerns. All underlying data are available in Supplementary Table S2.
	Amount (nmol metabolites g-1 FW)																							Photorespiration									TCA cycle									Amount (nmol metabolites gFW-1) Other amino acids
		CBC													Cytosolic									Amount (nmol metabolites gFW-1)																		Keto glutarate				OAA derived
	Time	RuBP		PGA		GAP/DHAP		ADPG		P5P		S7P			PEP		Pyr		Hexose 6-P		UDPG			2PG		Glycine		Serine		Glycerate			Citrate		Succinate		Fumarate		Malate			Glutamate		Glutamine		Aspartate		Asparagine
	0	90.0118	15.0853	152.347	31.3347	187.387	35.2882	7.04926	88.9775	33.6924	5.9722	42.0661	9.90042		16.9367	2.20638	98.617	21.7937	67.0216	11.2392	172.591	27.2686		27.1268	6.80377	16.9653	11.9046	307.32	69.5687	4176.72	1442.87		10481.7	2414.51	119.727	12.3709	291.629	1356.95	16274.6	3769.27		1960.6	404.33	1000.71	222.54	763.165	175.786	68.7109	12.56
	10	12.6173	2.90687	747.586	90.9971	22.2187	2.54309	0.749981	46.443	10.0838	2.11944	35.428	2.87269		73.3703	20.2738	276.857	57.6111	63.5749	3.21794	241.072	20.1358		5.80356	0.673354	3.23846	5.16742	691.67	183.039	10883.1	2132.14		22880.3	2679.77	219.104	21.9806	414.957	1480.86	18801.8	2301.88		3487.2	658.362	1656.73	274.111	881.026	142.18	41.4607	14.1949
	30	9.83292	1.67631	671.841	105.888	31.8018	7.05459	1.22853	51.4284	8.44657	0.543765	27.8811	5.48227		76.2856	9.7715	363.246	22.2396	54.0779	7.54525	229.598	17.9647		10.7351	1.30747	6.02126	12.7132	1781.13	317.853	4764.15	1173.54		19149.6	3020.7	116.938	9.48949	283.936	1708.35	15847	5047.78		3630.87	779.232	1959.23	494.983	778.097	159.775	65.7335	10.1395
	60	8.60595	1.27653	293.656	21.41	47.7357	14.8684	1.12976	17.3977	8.98011	2.66708	79.5715	28.9017		98.7975	18.3944	434.741	82.8338	63.6981	6.94905	295.876	50.2901		17.9965	2.8317	10.4141	11.9607	1497.82	119.358	13062.8	2387.93		21657.3	5366.79	439.615	130.798	795.73	2937.92	18222.1	2943.7		5972.24	1819.82	1892.21	425.691	1428.29	255.709	100.041	19.1415
	180	10.5877	1.08157	196.403	25.7917	77.3086	11.1248	1.22146	34.7596	5.25685	0.855199	45.6846	4.52165		77.1707	21.8484	492.767	75.6291	59.4019	10.0436	220.374	51.4143		17.5395	1.28345	9.41147	11.468	1170.61	113.953	6819.24	776.06		16052.3	3724	134.685	30.5293	397.758	2103	16339.7	3417.92		5540.06	642.571	1760.59	300.601	910.261	74.7978	76.2803	17.1125
	600	4.80781	1.14876	130.045	25.1981	19.9414	4.63867	1.94754	10.681	2.23195	0.312321	11.6902	1.71264		97.7675	9.51453	315.235	69.9463	35.9682	4.19016	225.341	21.4019		3.50485	0.887456	2.19615	7.60907	773.546	161.444	8387.85	1494.95		20484	2603.24	189.383	33.0827	484.044	1440.88	17521.6	3204.64		9424.9	1952.12	1891.41	270.85	1141.6	251.445	145.857	29.0238
	Label	%																Label %						Label	%								Label	%								Label	%
	Time	RuBP		PGA		GAP/DHAP		ADPG		P5P		S7P			PEP		Pyr		Hexose 6-P		UDPG			2PG		Glycine		Serine		Glycerate			Citrate		Succinate		Fumarate		Malate			Glutamate		Glutamine		Aspartate		Asparagine
	0	95.5292	0.242096	93.6646	0.0955482	87.9555	0.126323	95.7053	0.126377	96.1192	0.117096	87.9555	0.0412493		95.8442	0.534004	30.0725	4.78743	87.9555	0.709618	81.821	0.539019		34.3142	1.36811	52.7019	1.48619	60.2577	1.48492	20.0927	5.94977		0.21584	0.273385	0.601454	0.493378	2.45893	1.64619	4.67391	3.43249		2.81191	2.20222	2.91423	1.54128	38.5556	0.213037	9.11142	1.67503
	10	91.4209	0.498237	93.1561	0.236345	84.2647	0.76979	89.2103	3.94116	94.3301	0.173837	84.2647	0.0533149		96.2299	0.523969	35.5364	2.29274	84.2647	2.98062	78.3197	1.12511		34.0865	2.89873	47.9632	10.1788	73.4328	10.1651	13.0625	5.05383		1.21317	0.79177	0.556797	0.57695	2.00579	1.26967	5.07818	2.37876		3.11814	1.78434	2.55353	1.25165	33.5001	1.48394	10.8472	2.03729
	30	88.7711	1.30535	93.5385	0.218563	80.4273	1.1521	92.5645	0.142803	88.5277	1.80372	80.4273	0.55634		96.559	0.161951	38.3147	5.3693	80.4273	0.942752	65.9841	2.28353		32.2203	2.8991	38.2111	7.70398	76.1552	1.55268	21.6395	14.0463		1.9314	0.968628	0.723164	0.247217	2.20533	0.93661	5.38504	2.68917		3.79873	1.92673	3.11311	1.7706	35.5677	4.91626	13.1606	2.22868
	60	85.3256	1.06843	92.548	0.288868	73.3939	2.19031	79.8867	3.42296	83.1719	2.2925	73.3939	0.274672		95.0021	1.19016	51.9072	4.53487	73.3939	0.742751	61.2399	0.707812		32.0877	4.10112	31.4627	3.69639	69.7408	6.05948	16.2876	6.40016		1.75824	0.629485	2.06378	2.20351	1.86844	0.625532	5.81649	1.51332		5.57041	2.32622	4.15987	2.68551	34.7012	4.72306	16.3285	7.31807
	180	79.8872	0.748084	92.2012	0.657389	66.7383	1.00158	72.4697	3.94985	75.362	0.316136	66.7383	2.19233		94.7267	0.536804	61.2989	7.22885	66.7383	0.498943	60.3884	1.41482		32.928	0.381018	22.676	16.8122	68.0561	14.1479	18.8295	6.85094		4.04787	2.34494	2.02229	1.28512	1.8756	0.140629	5.4144	3.91508		6.26997	3.74985	3.27469	2.05076	31.0514	2.62784	15.7713	5.37096
	600	77.513	0.086214	83.0211	1.38716	48.9518	0.933832	62.1482	2.66563	78.7048	1.96434	48.9518	0.26865		87.552	0.474371	42.4203	6.65845	48.9518	1.02668	46.5933	0.597967		24.3748	0.269031	28.8404	16.4266	72.1502	4.80512	10.4451	5.26594		6.81675	2.12416	4.06651	1.42742	2.4685	0.59406	5.23248	0.726094		11.2065	2.24429	5.05943	1.60594	25.2025	4.85768	21.2441	5.17309
		Amount 13C (nmol g-1FW)															Molar labeled																Molar labeled									Molar labeled		Amount (nmol metabolites g-1 FW)
	Time	RuBP		PGA		GAP/DHAP		ADPG		P5P		S7P			PEP		Pyr		Hexose 6-P		UDPG			2PG		Glycine		Serine		Glycerate			Citrate		Succinate		Fumarate		Malate			Glutamate		Glutamine		Aspartate		Asparagine
	0	85.9875		142.695		164.817		6.74651		32.3848		36.9994			16.2329		29.6566		58.9491		141.215			9.30832		8.94101		185.184		839.217			22.6237		0.720105		7.17096		760.66			55.1303		29.1631		294.243		6.26054
	10	11.5349		696.422		18.7225		0.669061		9.51202		29.8533			70.6042		98.3851		53.5712		188.807			1.97823		1.55327		507.913		1421.61			277.577		1.21996		8.32319		954.791			108.736		42.305		295.145		4.49732
	30	8.72879		628.431		25.5773		1.13719		7.47755		22.424			73.6606		139.177		43.4934		151.498			3.45886		2.30079		1356.42		1030.94			369.854		0.845653		6.26174		853.367			137.927		60.993		276.751		8.65092
	60	7.34308		271.773		35.0351		0.902527		7.46893		58.4006			93.8597		225.662		46.7505		181.194			5.77468		3.27656		1044.59		2127.62			380.787		9.07269		14.8677		1059.89			332.678		78.7133		495.636		16.3353
	180	8.45818		181.086		51.5944		0.885188		3.96166		30.4891			73.1013		302.061		39.6438		133.08			5.77541		2.13415		796.671		1284.03			649.775		2.72371		7.46035		884.7			347.36		57.6539		282.648		12.0304
	600	3.72667		107.965		9.7617		1.21036		1.75665		5.72259			85.5974		133.724		17.6071		104.994			0.854299		0.633379		558.115		876.121			1396.34		7.70126		11.9486		916.816			1056.2		95.6946		287.711		30.9859
	Convert from % and from nano to micro			(*10)
	13C atoms	(nmol 13C g-1FW)															atoms labeled		(nmol C g-1 FW)								(nmol C g-1 FW)						atoms labeled			(nmol C g-1 FW)						atoms labeled				(nmol 13C g-1 FW)
	Time	RuBP	SD	PGA	SD	GAP/DHAP	SD	ADPG		P5P		S7P			PEP		Pyr		Hexose 6-P		UDPG			2PG		Glycine		Serine		Glycerate			Citrate		Succinate		Fumarate		Malate			Glutamate		Glutamine		Aspartate		Asparagine
	0	429.838	71.2078	428.138	88.4709	512.623	97.1368	40.4756	3.89373	161.946	28.9065	281.276	66.244		48.7137	6.50323	87.4755	12.5891	353.511	57.8103	847.743	138.607		52.1083	12.2709	63.7099	13.982	553.994	117.301	2382.75	589.947		109.365	120.164	2.99276	2.4811	27.4986	17.0723	2802.9	2001.97		248.23	177.725	135.315	44.7482	1177.55	274.27	24.6476	3.06348
	10	57.6327	13.0388	2089.26	254.649	57.8155	7.02055	4.00209	0.377945	47.5609	9.99213	235.416	18.9594		211.622	57.5755	293.173	49.8451	321.181	12.5574	1132.47	89.841		10.6422	0.918279	73.007	10.6486	1550.77	602.593	4175.56	1579.26		1736.4	1190.39	4.57188	4.38962	31.5724	16.547	3677.72	1275.23		546.86	321.427	201.324	65.2419	1175.38	144.945	18.4942	8.14447
	30	43.6906	7.81409	1885.04	294.411	82.3153	19.3078	6.82147	1.63203	37.3632	1.89529	184.336	35.2137		221.007	28.5858	415.521	41.5722	260.921	36.3586	909.346	85.1735		19.225	2.08227	63.5171	8.11712	4059.6	646.628	3394.36	2917.8		2323.93	1510.16	3.44266	1.44896	28.9113	7.57985	3059.75	928.994		642.294	250.259	278.034	129.545	1126.28	382.956	34.7093	9.03914
	60	36.735	5.62137	815.433	61.7482	115.244	38.6612	5.4232	0.51062	37.1831	10.2013	522.011	189.593		281.158	49.1461	669.681	72.824	280.304	27.8383	1085.85	172.817		30.2794	5.90231	67.228	14.7742	3146.54	515.009	6426.81	2752.22		2191.69	678.795	28.7204	26.2161	55.6853	9.01803	4132.06	462.919		1522.33	211.218	356.324	154.292	1967.12	335.561	61.8992	15.6579
	180	42.2838	4.21277	542.919	67.4726	174.496	27.3963	5.34363	1.25428	19.8173	3.30521	295.729	22.9744		219.081	60.8474	913.41	233.419	237.663	38.4337	801.34	204.205		34.0199	2.35662	21.9674	11.6152	2357.77	265.378	3757.28	1083.75		3554.55	1271.56	9.95038	4.01928	30.0049	9.68142	3182.81	1796.16		1665.7	804.935	267.97	139.55	1128.75	108.419	50.5597	27.567
	600	18.6357	4.46896	324.254	66.2377	42.1632	10.0302	7.29935	1.85075	8.79939	1.41694	71.9284	10.3347		256.865	26.1691	410.233	148.554	105.762	14.0508	629.451	51.8128		6.81777	1.74158	19.8997	9.02964	1681.96	428.622	2785.32	1816.21		8170.92	1505.28	29.8907	6.86346	46.8546	5.33166	3611.59	296.161		5136.04	254.316	465.532	107.87	1167.89	386.988	119.943	5.86828
												1.74158
	Fig. 1
	Fig 3
	Fig 4
															Fig 5
																																										=
	Fig 6
												% label
	Fig 6 continued
	Fig. 7
	Fig. 8
[truncated: 22 more columns]
